# Supplementary material for: The Schizosaccharomyces pombe PPR protein Ppr10 associates with a novel protein Mpa1 and acts as a mitochondrial translational activator
Source: PubMed Central journal article supplement — Nucleic Acids Res. 2017 Feb 22;45(6):3323–40. doi: 10.1093/nar/gkx127 (PMC5389468; doi:10.1093/nar/gkx127), 2017-02-22
Supplement: gkx127_Supp.pdf [file gkx127_Supp.pdf]

## SUPPLEMENTARY DATA

Supplementary Figure S1. The PPR motifs in *S. pombe* Ppr10. The PPR motifs were identified by TPRpred. The sequence logo for the fission yeast PPR motifs was derived from 348 PPR motifs identified from fission yeast *S. pombe*, *S. cryophilos*, *S. octosporus* and *S. japonicus* PPR proteins, and created using WebLogo (<http://weblogo.berkeley.edu/logo.cgi>). The height of each amino acid residue indicates the level of conservation at that position. non-polar, aliphatic residues (G, A, V, L, I, P) were colored blue, aromatic residues (F, Y, W) colored purple, polar, non-charged residues (S, T, C, M, N, Q) colored green, positively charged residues (K, R, H) colored red, negatively charged residues (D, E) colored orange. The secondary structure of the PPR motifs is also indicated.  $\alpha$ -helices and loops are indicated by rods and solid lines, respectively.

Supplementary Figure S2. Predicted secondary structure of Ppr10. Secondary structure of Ppr10 predicted with PSIPRED are shown below the sequence.  $\alpha$ -helices and loops are indicated by rods and solid lines, respectively.

Supplementary Figure S3. Deletion of *ppr10* results in aggregation of the cells. (A)  $\Delta$ *ppr10* cells display cell shape phenotypes. The cells are grown to stationary phase and morphology was examined by microscopy. Bar, 10  $\mu$ m. (B)  $\Delta$ *ppr10* cells display the flocculent phenotype. Cells were grown to stationary phase, vortexed well, allowed to stand for the indicated times, and photographed. Flocculation causes the cells to fall out of suspension and to sink quickly to the bottom of the tube.

Supplementary Figure S4. None of the introduced tags impairs protein function. (A) A 10-fold dilution spot assay of tagged strains used in this study. Cells were grown to log phase in YES and 10-fold serial dilutions were spotted onto YES media containing 3% glucose (YES+Glu) or 6% glycerol (YES+Gly). (B) Western blot analysis of *S. pombe* extracts of tagged strains used in A, using anti-CBP Ab to detect Ppr10-TAP, anti-c-Myc Ab to detect Ppr10-Myc, anti-HA Ab to detect Mpa1-HA, anti-FLAG Ab to detect Mti2 and anti-Mpa1 Ab to detect Mpa1 and Mpa1-HA. Sla1 serves as the loading control. Positions of molecular weight markers (in kDa) are

indicated on the right. *S. pombe* cells were grown to log phase in YES, and cell extracts were prepared by alkaline extraction.

Supplementary Figure S5. Predicted secondary structure of Mpa1. See the legend of Supplementary Figure S2 for description.

Supplementary Figure S6. RNase A treatment does not abolish the association between Ppr10 and Mpa1. Associated Cells expressing chromosomally encoded Ppr10-Myc and Mpa1-HA were grown to mid-log phase in YES medium, lysed by glass bead beating. Extracts were treated with RNase A prior to anti-HA IP. Extracts and immunoprecipitates were analyzed by Western blotting with anti-HA to detect Mpa1-HA and anti-*c*-Myc Ab to detect Ppr10-Myc. The amount of input (In) is 2.5% of the lysate used for IP. As a control, IP was performed on an extract from wild-type cells expressing chromosomally encoded Ppr10-Myc.

Supplementary Figure S7. Deletion of *mpa1* causes flocculation.  $\Delta$ *mpa1* cells display the flocculent phenotype. Cells were grown to stationary phase, vortexed well, allowed to stand for the indicated times, and photographed. Flocculation causes the cells to fall out of suspension and to sink quickly to the bottom of the tube.

Supplementary Figure S8. qRT-PCR analysis of expression of *S. pombe ppr10* in the wild-type and *mpa1* deletion mutant cells. All mRNA levels were normalized to the *htb1* mRNA level and expressed as fold change relative to the wild-type cells, which was set at a value of 1. Data are represented as mean  $\pm$  SD. Statistical analyses were performed using the Student's *t* test.

Supplementary Figure S9. RNase A treatment does not abolish the association between Ppr10 and Mti2. Associated cells expressing chromosomally encoded Ppr10-Myc and Mti2-FLAG were grown to mid-log phase in YES medium, lysed by glass bead beating. Extracts were treated with 0.05 mg/ml RNase A for 30 min at 25 °C, and subjected to anti-*c*-Myc IPs. Extracts and immunoprecipitates were analyzed by Western blotting with anti-*c*-Myc Ab to detect Ppr10-Myc and anti-FLAG to detect Mti2-FLAG. The amount of input (In) is 4% of the lysate used for IP. As a

control, IP was performed on an extract from wild-type cells expressing chromosomally encoded Mti2-FLAG.

Supplementary Table S1. The *S. pombe* strains used in this study

Supplementary Table S2. Primer sequences used in this study

Supplementary Table S3. Peptide sequences identified from mass spectrometric analyses of in-gel tryptic digestions of protein bands.

Supplementary Figure S1

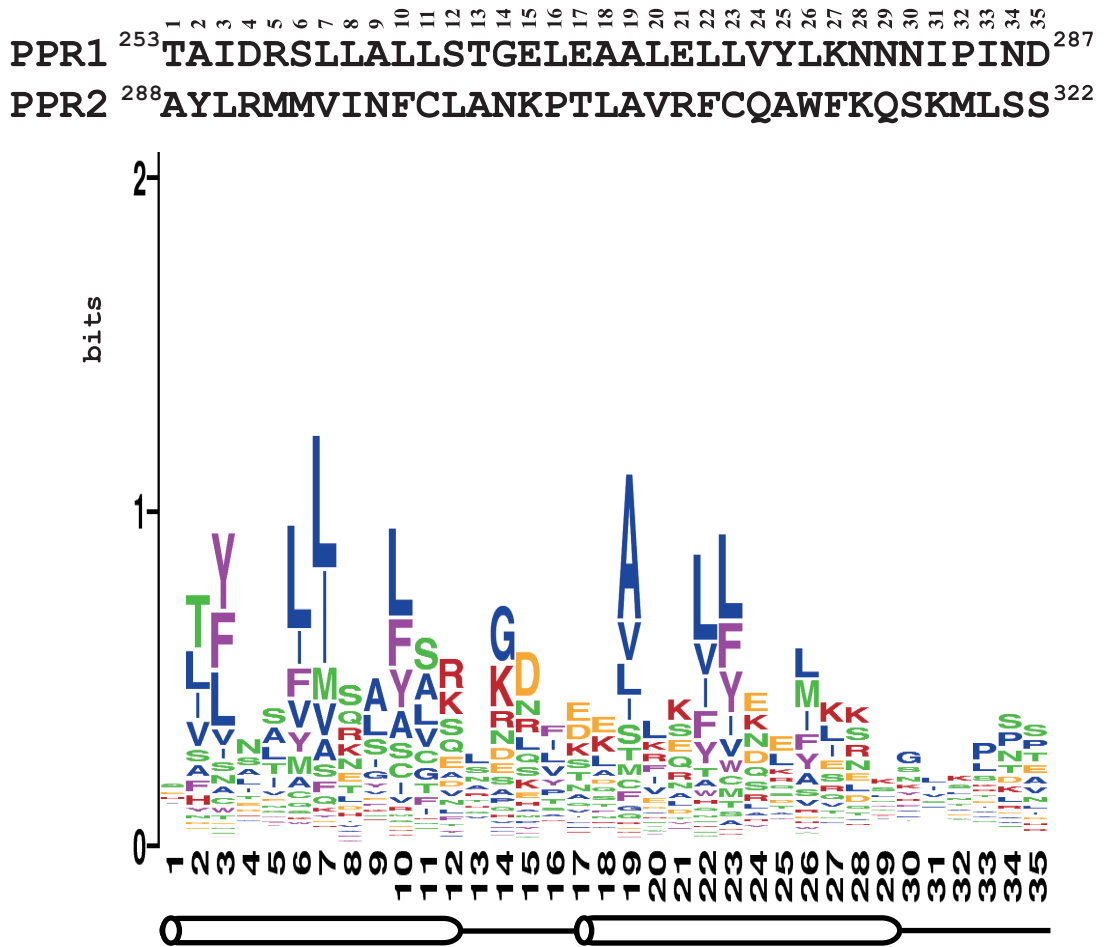

# Supplementary Figure S2

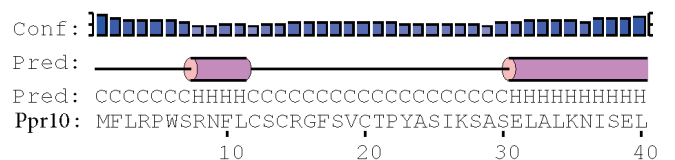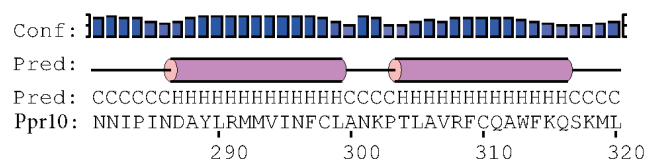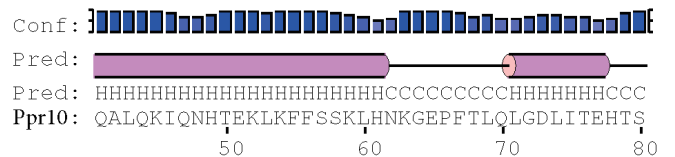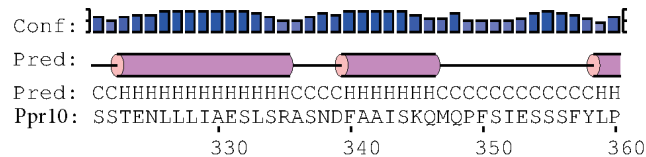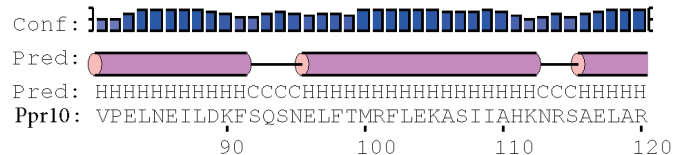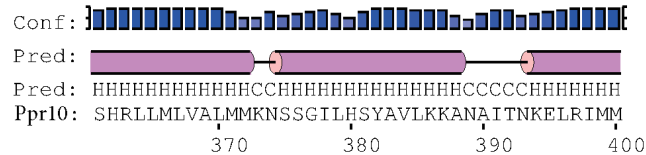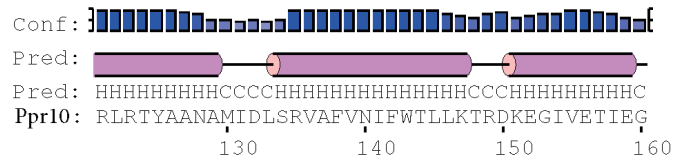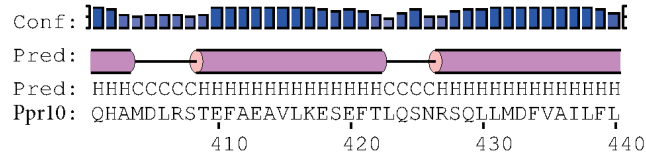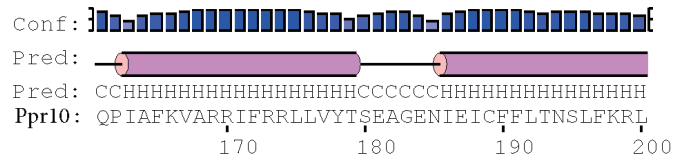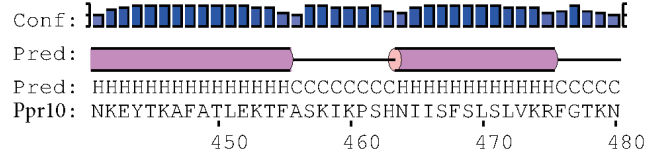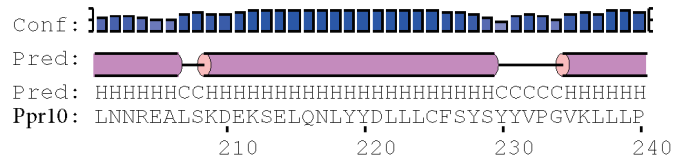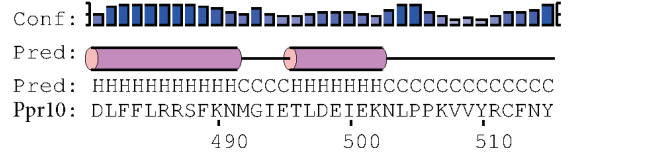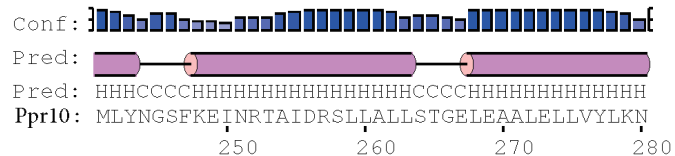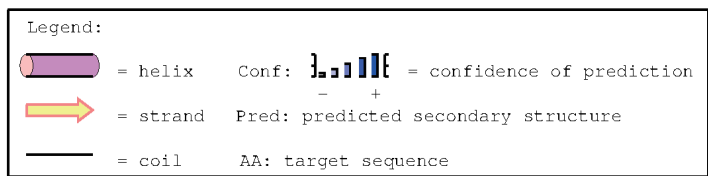

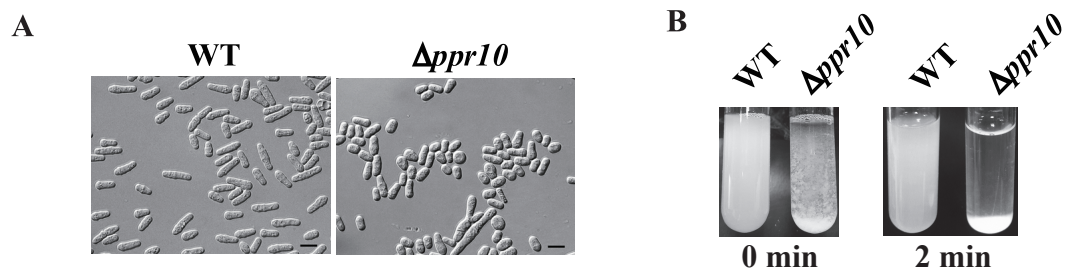

**A**

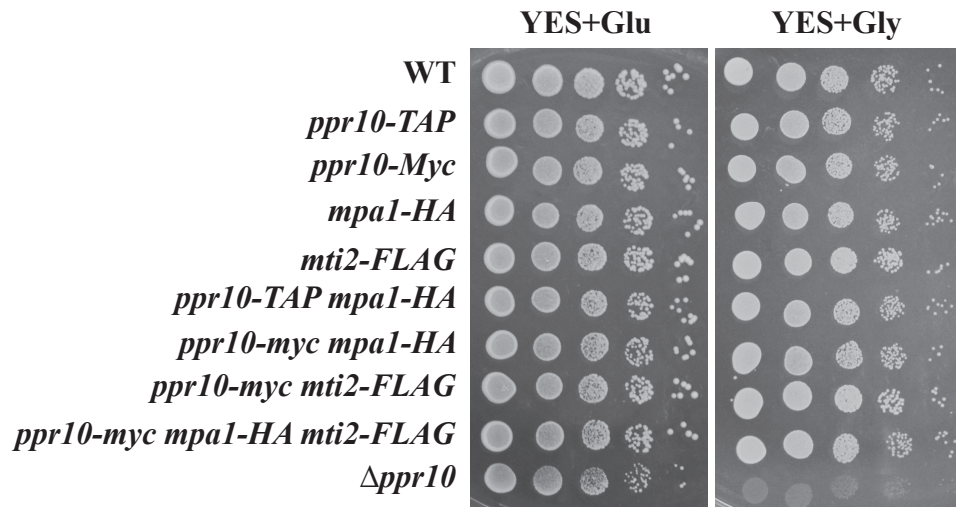

**B**

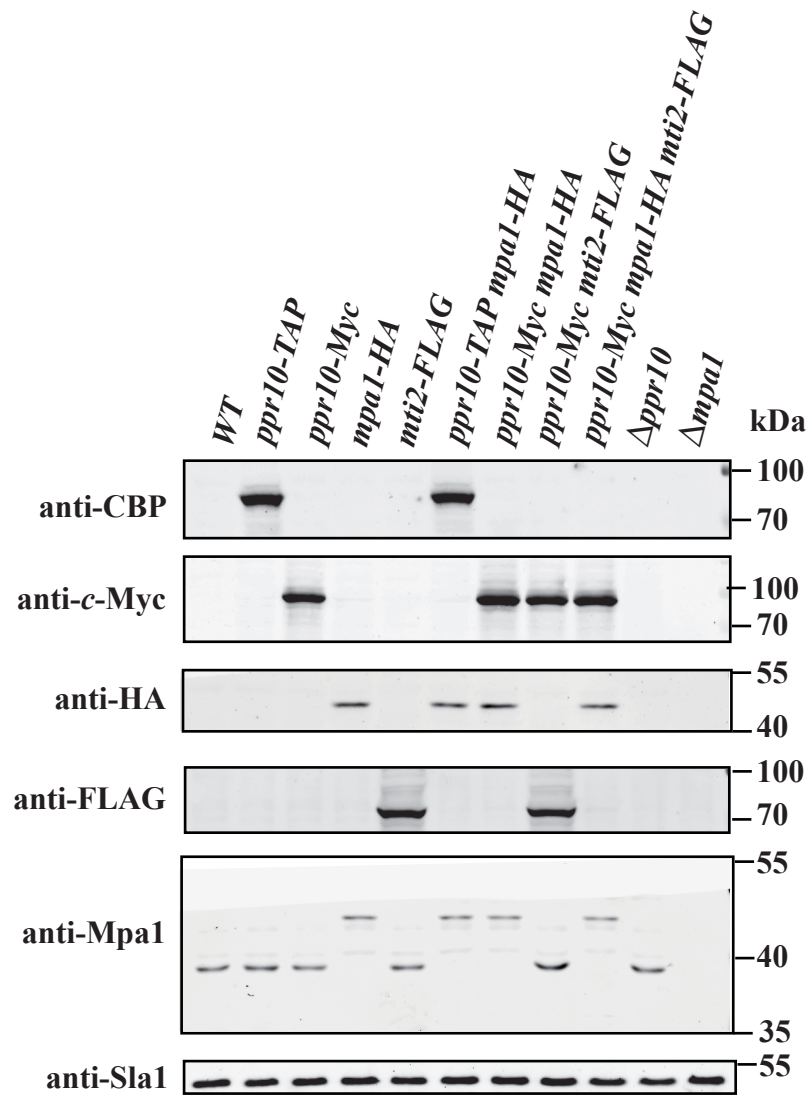





Supplementary Figure S6

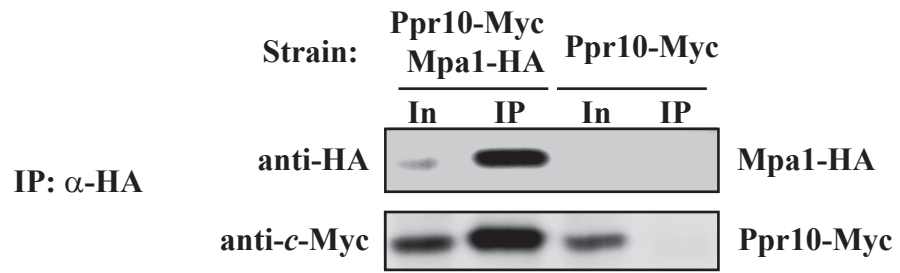

Supplementary Figure S7

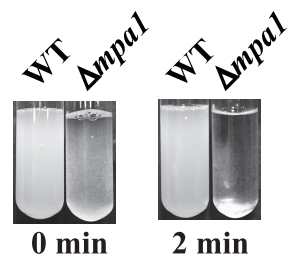

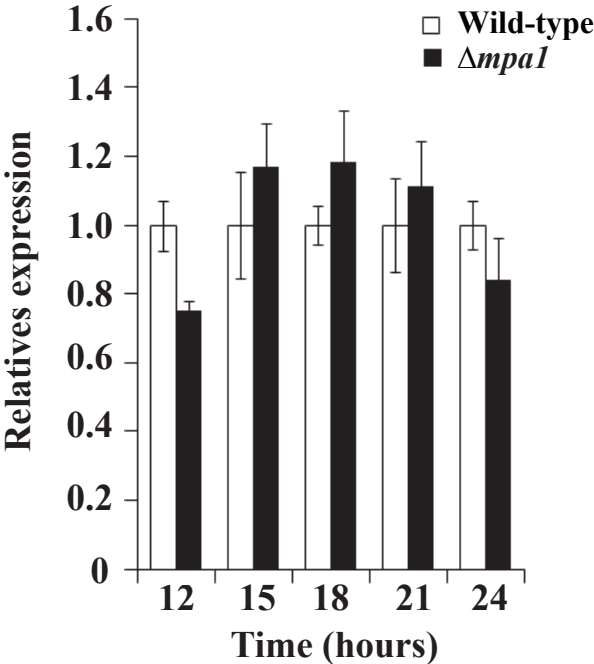

Supplementary Figure S9

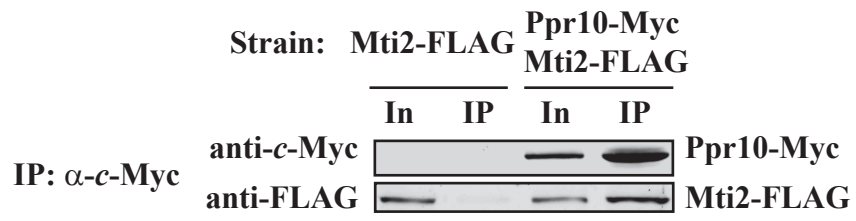

Supplementary Table S1. *S. pombe* strains used in this study

| Strain  | Genotype                                                                                                                                                                        | Source     |
|---------|---------------------------------------------------------------------------------------------------------------------------------------------------------------------------------|------------|
| yHL6381 | <i>h<sup>+</sup> leu1-32 his3-D1 ura4-D18 ade6-M210</i>                                                                                                                         | H. Levin   |
| yHH1    | <i>h<sup>+</sup> leu1-32 his3-D1 ura4-D18 ade6-M210 Δppr10::kanMX6</i>                                                                                                          | This paper |
| yZQ1    | <i>h<sup>+</sup> leu1-32 his3-D1 ura4-D18 ade6-M210 Δmpa1::kanMX6</i>                                                                                                           | This paper |
| yWP1    | <i>h<sup>+</sup> leu1-32 his3-D1 ura4-D18 ade6-M210 ppr10::[ppr10-TAP-kanMX6]</i>                                                                                               | This paper |
| yWP2    | <i>h<sup>+</sup> his3-D1 ura4-D18 ade6-M210 mpa1::[mpa1-3HA-leu1<sup>+</sup>]</i>                                                                                               | This paper |
| yYJ1    | <i>h<sup>+</sup> leu1-32 his3-D1 ura4-D18 ade6-M210 ppr10::[ppr10-13MYC-kanMX6]</i>                                                                                             | This paper |
| yYJ2    | <i>h<sup>+</sup> leu1-32 his3-D1 ura4-D18 ade6-M210 ppr10::[ppr10-TAP-kanMX6]</i><br><i>mpa1::[mpa1-3HA-leu1<sup>+</sup>]</i>                                                   | This paper |
| yYJ3    | <i>h<sup>+</sup> leu1-32 his3-D1 ura4-D18 ade6-M210 ppr10::[ppr10-13MYC-kanMX6]</i><br><i>mpa1::[mpa1-3HA-leu1<sup>+</sup>]</i>                                                 | This paper |
| yYJ4    | <i>h<sup>+</sup> leu1-32 his3-D1 ura4-D18 ade6-M210 Δppr10::kanMX6</i><br><i>mpa1::[mpa1-3HA-leu1<sup>+</sup>]</i>                                                              | This paper |
| yYJ5    | <i>h<sup>+</sup> leu1-32 his3-D1 ura4-D18 ade6-M210 ppr10::[ppr10-13MYC-ura4<sup>+</sup>]</i>                                                                                   | This paper |
| yYJ6    | <i>h<sup>+</sup> leu1-32 his3-D1 ura4-D18 ade6-M210 ppr10::[ppr10-13MYC-ura4<sup>+</sup>]</i><br><i>Δmpa1::kanMX6</i>                                                           | This paper |
| yYJ7    | <i>h<sup>+</sup> his3-D1 ura4-D18 ade6-M210 ppr10::[ppr10-13MYC-ura4<sup>+</sup>]</i><br><i>Δmpa1::kanMX6 leu1-32::[pJK148(leu1<sup>+</sup>)]</i>                               | This paper |
| yYJ8    | <i>h<sup>+</sup> his3-D1 ura4-D18 ade6-M210 ppr10::[ppr10-13MYC-ura4<sup>+</sup>]</i><br><i>Δmpa1::kanMX6 leu1-32::[mpa1-3HA-leu1<sup>+</sup>]</i>                              | This paper |
| yYJ9    | <i>h<sup>+</sup> his3-D1 ura4-D18 ade6-M210 ppr10::[ppr10-13MYC-ura4<sup>+</sup>]</i><br><i>leu1-32::[pJK148(leu1<sup>+</sup>)]</i>                                             | This paper |
| yYJ10   | <i>h<sup>+</sup> leu1-32 his3-D1 ura4-D18 ade6-M210 ppr10::[ppr10-13MYC-kanMX6]</i><br><i>mpa1::[mpa1-3HA-leu1<sup>+</sup>]</i><br><i>tom20::[tom20-2FLAG-ura4<sup>+</sup>]</i> | This paper |
| yYJ11   | <i>h<sup>+</sup> leu1-32 his3-D1 ura4-D18 ade6-M210 ppr10::[ppr10-13MYC-kanMX6]</i><br><i>mti2::[mti2-2FLAG-ura4<sup>+</sup>]</i>                                               | This paper |
| yYJ12   | <i>h<sup>+</sup> leu1-32 his3-D1 ura4-D18 ade6-M210 mti2::[mti2-2FLAG-ura4<sup>+</sup>]</i>                                                                                     | This paper |
| yYJ13   | <i>h<sup>+</sup> leu1-32 his3-D1 ura4-D18 ade6-M210 ppr10::[ppr10-13MYC-kanMX6]</i><br><i>mti3::[mti3-2FLAG-ura4<sup>+</sup>]</i>                                               | This paper |
| yYJ14   | <i>h<sup>+</sup> leu1-32 his3-D1 ura4-D18 ade6-M210 mti3::[mti3-2FLAG-ura4<sup>+</sup>]</i>                                                                                     | This paper |
| yZQ2    | <i>h<sup>+</sup> his3-D1 ura4-D18 ade6-M210 Δmpa1::kanMX6</i><br><i>leu1-32::[pJK148(leu1<sup>+</sup>)]</i>                                                                     | This paper |
| yZQ3    | <i>h<sup>+</sup> his3-D1 ura4-D18 ade6-M210 Δmpa1::kanMX6</i><br><i>leu1-32::[mpa1-3HA-leu1<sup>+</sup>]</i>                                                                    | This paper |
| yMX1    | <i>h<sup>+</sup> leu1-32 his3-D1 ura4-D18 ade6-M210 Δppr10::kanMX6/pREP82X</i>                                                                                                  | This paper |
| yMX2    | <i>h<sup>+</sup> leu1-32 his3-D1 ura4-D18 ade6-M210 Δppr10::kanMX6</i><br><i>/pREP82X-ppr10</i>                                                                                 | This paper |
| yMX3    | <i>h<sup>+</sup> leu1-32 his3-D1 ura4-D18 ade6-M210 Δppr10::kanMX6</i><br><i>/pREP82X-ppr10ΔPPR</i>                                                                             | This paper |
| yMX4    | <i>h<sup>+</sup> leu1-32 his3-D1 ura4-D18 ade6-M210 Δppr10::kanMX6</i><br><i>/pREP82X-5FLAG</i>                                                                                 | This paper |
| yMX5    | <i>h<sup>+</sup> leu1-32 his3-D1 ura4-D18 ade6-M210 Δppr10::kanMX6</i><br><i>/82X-ppr10-5FLAG</i>                                                                               | This paper |
| yMX6    | <i>h<sup>+</sup> leu1-32 his3-D1 ura4-D18 ade6-M210 Δppr10::kanMX6</i><br><i>/82X-ppr10ΔPPR-5FLAG</i>                                                                           | This paper |
| ySM1    | <i>h<sup>+</sup> leu1-32 his3-D1 ura4-D18 ade6-M210 ppr10::[ppr10-13MYC-ura4<sup>+</sup>]</i><br><i>Δmpa1::kanMX6 Δlon1::hphMX6</i>                                             | This paper |
| ySM2    | <i>h<sup>+</sup> leu1-32 his3-D1 ura4-D18 ade6-M210 Δppr10::kanMX6</i><br><i>Δmpa1::hphMX6</i>                                                                                  | This paper |
| ySM3    | <i>h<sup>+</sup> leu1-32 his3-D1 ura4-D18 ade6-M210 ppr10::[ppr10-13MYC-ura4<sup>+</sup>]</i><br><i>Δlon1::hphMX6</i>                                                           | This paper |
| Cy0989  | <i>h<sup>-</sup> ptp1-1 rho0 ade6M-216 leu1-32</i>                                                                                                                              | J. Liu     |

Supplementary Table S2. Primers and oligonucleotides used in this study

| Name                                                                                                     | Primer sequence (5' to 3')   |
|----------------------------------------------------------------------------------------------------------|------------------------------|
| <b>Primer sequences for qRT-PCR analysis of mt-RNAs</b>                                                  |                              |
| htb1-f                                                                                                   | GGATTTGTTGTAGCAAGTCGAGTAT    |
| htb1-r                                                                                                   | ATGATAGCCACAACGTCTTGTATG     |
| cox1-exon12-RT-5                                                                                         | TGGACGGTATATCCACCACT         |
| cox1-exon12-RT-3                                                                                         | GTCGCTATTAAATTTACTGATCC      |
| cox2-2-f                                                                                                 | AAGTGGTGATGTTATCCATAGTTGG    |
| cox2-2-r                                                                                                 | AGATACACCTTGAACAACAATAGGC    |
| cox3-f                                                                                                   | CCACCAGTAGGAATAGCAGATAAAA    |
| cox3-r                                                                                                   | TGAGCATAAGTTAAACTAGCACCAG    |
| cob-RT-5                                                                                                 | GCCTTTTGTATTGCTGCTTTA        |
| cob-RT-3                                                                                                 | GTTATCAAAT CTTTTATCAG ATAAT  |
| atp6-f                                                                                                   | TACCTTCTGGTACTCCTACTCC       |
| atp6-r                                                                                                   | TAGCACCTAA TCGAATACCT AAACCT |
| atp8-RT-5                                                                                                | ATGCCACAATTAGTACCATTCT       |
| atp8-RT-3                                                                                                | AAAGAACTTATAATAGATCTTGAG     |
| atp9-f                                                                                                   | GGTGCTGGTGTGGTATTGGA         |
| atp9-r                                                                                                   | ACCTGTAGCTTCTGTAAAGGCG       |
| var1-f                                                                                                   | AGAGCTCTTCCTATTTCAACTCCTT    |
| var1-r                                                                                                   | ACCTTTCCATCCTTTTGGTACA       |
| rnpB-f                                                                                                   | GGAAAGTTTGGATCACTCATAACATTAG |
| rnpB-r                                                                                                   | TAATATTAGTAGACTTACCCTCTTGGG  |
| rns-f                                                                                                    | GAAGGAGGAATTGCGAGTAATCAC     |
| rns-r                                                                                                    | CGACTTAACACTAATTGCACAACACC   |
| rnl-f                                                                                                    | GTAGCACGGTAGTAAAGCCAAATTG    |
| rnl-r                                                                                                    | TAAGGATTTGTACATCCTAAGGATGTCC |
| <b>Primer sequences for qRT-PCR analysis of expression of <i>ppr10</i> in the absence of <i>mpa1</i></b> |                              |
| ppr10-f                                                                                                  | GGACCTCCGATCAACTGAATTCCG     |
| ppr10-r                                                                                                  | CTCATCCAGAGTTTCTATGCCCATG    |
| <b>Primer sequences for RT-PCR analysis of immunoprecipitated RNA</b>                                    |                              |
| cox1-UTR-f                                                                                               | AATCTTAATGATCTTTTCATCTACC    |
| cox1-UTR-r                                                                                               | AGTATGGCAATATCCTTAGC         |
| cox2-UTR-f                                                                                               | CTTAAATAATAATTTTGAAACTATTAC  |
| cox2-UTR-r                                                                                               | AGATGCACCATCTTGGAA           |
| cox3-UTR-f                                                                                               | AGCTATCCTATTCAA AATTGTATC    |
| cox3-UTR-r                                                                                               | AAGGTGACGCACTTACAAT          |
| cob-UTR-f                                                                                                | ATCTAACCTATCTTATCTTTTATTATC  |
| cob-UTR-r                                                                                                | AGGTT CAGGAGCATCAATC         |
| atp6- UTR-f                                                                                              | GGATAAAAAATCTCTAAAAGATTTTTC  |
| atp6- UTR-r                                                                                              | CCAAAATTAGAGAAATCAA AATGG    |
| Atp8- UTR-f                                                                                              | GTTGTATGGAATTTTCAATGAAG      |
| Atp8- UTR-r                                                                                              | AATAGAATGGTACTAATTGTGGC      |
| Atp9- UTR-f                                                                                              | AAAGTCTACAGATAAAAAAATCAC     |
| Atp9- UTR-r                                                                                              | TCCAATACCAACACCAGCACC        |

---

|                           |                              |
|---------------------------|------------------------------|
| Var1- UTR-f               | CACTTTATTAGTGGGATGG          |
| Var1- UTR-r               | GGTATTGAAAAATTAGCTTTTTG      |
| rns-f                     | GAAGGAGGAATTGCGAGTAATCAC     |
| rns-r                     | CGACTTAACACTAATTGCACAACACC   |
| rnl-f                     | GTAGCACGGTAGTAAAGCCAAATTG    |
| rnl-r                     | TAAGGATTTGTACATCCTAAGGATGTCC |
| mt-tRNA <sup>Leu</sup> -f | TTAGGGAAGTATGCAGATGT         |
| mt-tRNA <sup>Leu</sup> -r | TCCTACAGATGGAAGGATTCCG       |
| actin-f                   | TCCGCTCTTAACATCTCATGAGG      |
| actin-r                   | AAGGCTAGCTCTGCATTCGTCTAT     |

### Oligonucleotide sequences for Northern blot analysis

|                        |                              |
|------------------------|------------------------------|
| mt-tRNA <sup>Lys</sup> | CCTTATCCTATCGCTTAAAAG        |
| mt-tRNA <sup>Arg</sup> | CTCTAACCAATTAAGCTAAAAGT      |
| mt-tRNA <sup>His</sup> | GCCACAAATAAGCATTCT           |
| mt-tRNA <sup>Phe</sup> | CTTCAATACTGCACTTTAACCG       |
| mt-tRNA <sup>Leu</sup> | GGTAAACATGTTTACCAATTTTCATC   |
| mt-tRNA <sup>Asp</sup> | GCGATACTTTACTTTAAGCTACAG     |
| mt-tRNA <sup>Gly</sup> | AAATCAGAAGGTCTGCCAAT TGAC    |
| cob1-exon2-probe-5     | GAGCTATACCTAACTTCCAATTAGG    |
| cob1-exon2-probe-3     | ATAGAAGATTGTAGCAATAGCACCG    |
| cox1-exon2-probe-5     | CCACCACTATCAAGTATCACTTC      |
| cox1-exon2-probe-3     | CCTCTGGATGACCAAAGAAC         |
| cox2-probe-5           | GACTGTTAAGGCAATTGGAAGACAATGG |
| cox2-probe-3           | GAGATACACCTTGAACAACAATAGGC   |
| cox3-probe-5           | GGAGGTCAAGCTTATGAATACTGG     |
| cox3-probe-3           | CCAAACAACATCACAGAAATGCC      |
| atp6-probe-5           | CTGTATCAGGACAAAGCTATTTCCC    |
| atp6-probe-3           | TAGCACCTAATCGAATACCTAAACTT   |
| RNL-probe-5            | GCAAATTAGCTCTGTTACTTCGGTA    |
| RNL-probe-3            | TCTAGCTGAGGGAACACTGTATCTT    |
| RNS-probe-5            | TAGATCGCGAAAGAGATTAGATACC    |
| RNS-probe-3            | TATATCACGTCTATAGCCCTTTCCA    |
| atp9-probe             | ATTAAGTTACTGAAGATTAATCCAA    |
|                        | TACCAACACCAGCACCCTAACACC     |
| rnpB-probe             | ACCCTCTTGGGTTTCTTTTTTATTAA   |
|                        | CCACTTTAAACAAATACTATTCTA     |
| ATP8-probe-5           | TGCCACAATTAGTACCATTCTA       |
| ATP8-probe-3           | CATTATATCTTGGTAATACATACTGATG |
| Var1-probe             | GTAATTTGGGTAAATTAATAAATCGTTA |
|                        | GGATCTATCCATAATGTAG          |

### Primer sequences (5' to 3') for mtDNA copy number determination

|              |                           |
|--------------|---------------------------|
| spo12-f      | TCGGCTCTAAGAAGGTATCTGTATC |
| spo12-r      | AGTACCAGATCTGCCTGAGTAGTTG |
| ace2-f       | CAAGACAAAATCTACTCCAAGTCGT |
| ace2-r       | CATTAACCAAGTAGCGAGAACGTAT |
| exg1-f       | CTACCTCGGTTAATTGGACTTTGTA |
| exg1-r       | TCTTCAGGATCCTACATAGAAAACC |
| cox1-mtDNA-f | CGGTGTTGTTAGTCACATTATTCCT |

---

---

|              |                            |
|--------------|----------------------------|
| cox1-mtDNA-r | TGCAGCACTGAAATAAGCTCTAGTA  |
| cox3-mtDNA-f | CCACCAGTAGGAATAGCAGATAAAA  |
| cox3-mtDNA-r | TGAGCATAAGTTAAACTAGCACCCAG |
| cob1-mtDNA-f | TGCAAATGGTGCTAGTTTCTTC     |
| cob1-mtDNA-r | TAGTAATAACAGTTGCACCCCAGA   |
| atp9 mtDNA-f | GGTGCTGGTGTGGTATTGGA       |
| atp9 mtDNA-r | ACCTGTAGCTTCTGTTAAGGCG     |

---



Supplementary Table S3. Peptide sequences identified from mass spectrometric analyses of in-gel tryptic digestions of protein bands.

| Name | NCBI accession number <sup>a</sup> | Peptide sequence <sup>b</sup>                  | Score <sup>c</sup> | Observed m/z | Mr (exp) <sup>d</sup> | Mr (calc) |
|------|------------------------------------|------------------------------------------------|--------------------|--------------|-----------------------|-----------|
| Mpa1 | gi:19115049                        | <sup>27</sup> GYRPSEGIWFR <sup>37</sup>        | 33                 | 1367.6       | 1366.6                | 1366.7    |
| Act1 | gi:1304269                         | <sup>85</sup> IWHHTFYNELR <sup>95</sup>        | 56                 | 1515.7       | 1514.7                | 1514.7    |
|      |                                    | <sup>239</sup> SYELPDGQVITIGNER <sup>254</sup> | 88                 | 1790.8       | 1789.8                | 1789.9    |
| Tdh1 | gi:19112946                        | <sup>310</sup> LVSWYDNEWGYSR <sup>322</sup>    | 84                 | 1674.8       | 1673.8                | 1673.7    |

<sup>a</sup>NCBI accession number of the matching protein.

<sup>b</sup>Sequence information from the mass spectrometry data were searched against the NCBI non-redundant protein database. Peptide matches were checked manually and only those identifications with an ions score of 22 or higher were accepted.

<sup>c</sup>The reported ions score is  $-10 \log(P)$ , where P is the probability that the observed match is a random event. Individual ions score  $>22$  indicate identity or extensive homology ( $p < 0.05$ ).

<sup>d</sup>The determined molecular mass of the closest matching peptide.

<sup>e</sup>The theoretical mass of the closest matching peptide.
